# Supplementary material
Source: PubMed Central journal article supplement (PMC10841712)
Supplement: NIHMS1933374-supplement-Supplemental_Publication_Material.pdf [file NIHMS1933374-supplement-Supplemental_Publication_Material.pdf]

# **Obesity Modifies Clinical Outcomes of Right Ventricular Dysfunction**

## **SUPPLEMENTAL MATERIAL**

**Figure S1.** Kaplan-Meier survival and heart failure (HF) hospitalization curves across obesity classes

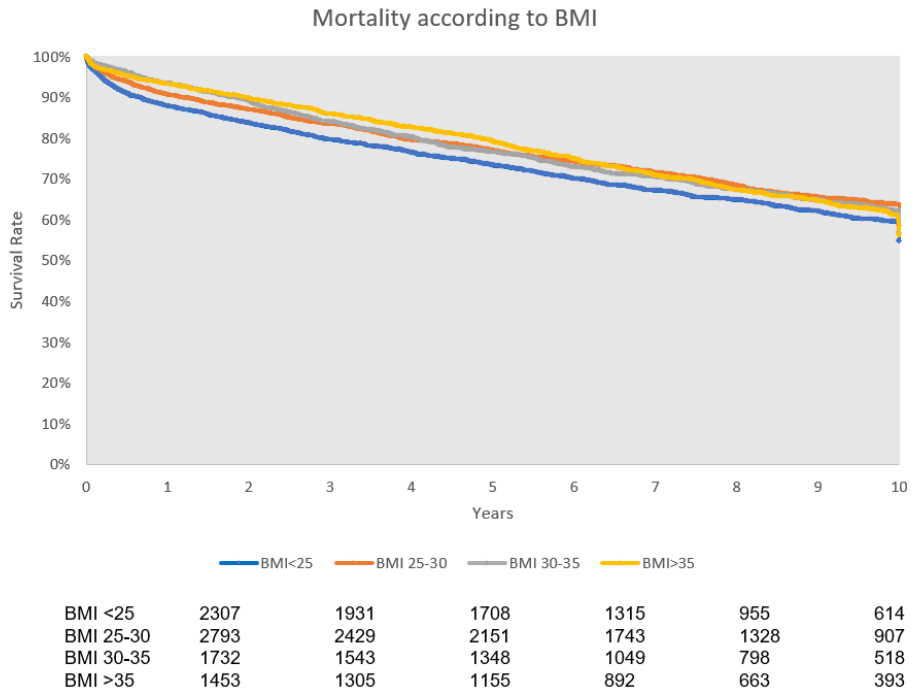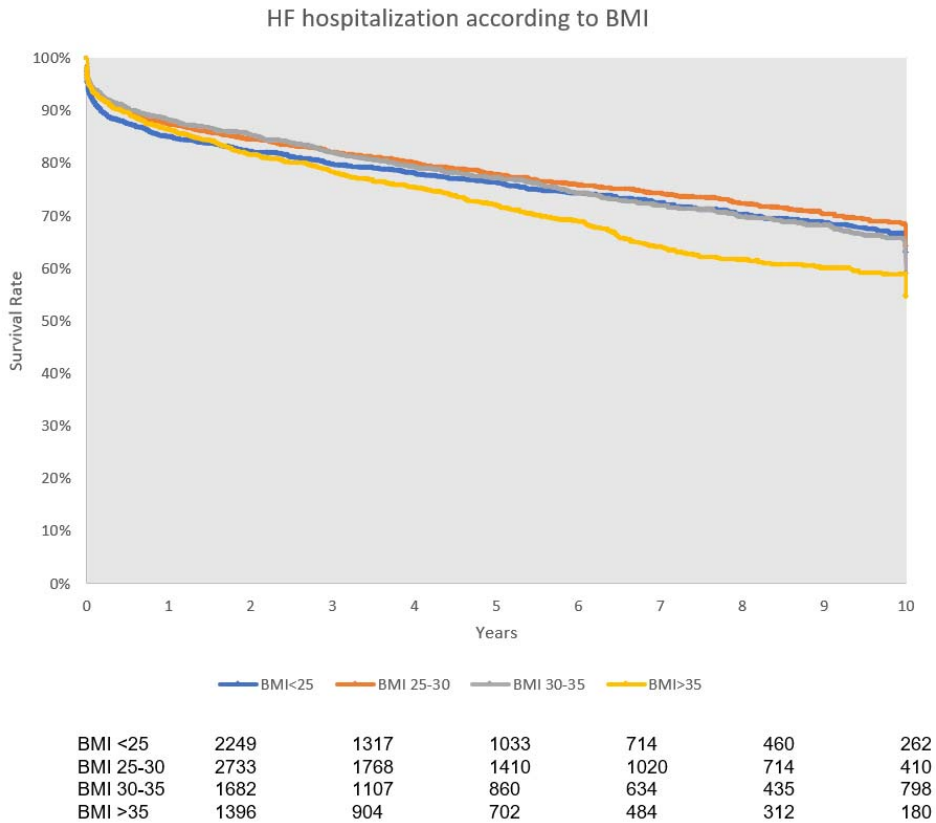

Kaplan-Meier survival curves displaying data for all-cause mortality and heart failure hospitalization, with follow-up duration of 10 years after right heart catheterization.

**Table S1. Associations between adverse outcomes and indices of RV function, with effect sizes scaled to per 1-log-unit change**

| Predictors                 | Multivariable Adjusted |           |         |
|----------------------------|------------------------|-----------|---------|
|                            | HR                     | 95% CI    | p value |
| <b>All-Cause Mortality</b> |                        |           |         |
| PAPi                       | 0.87                   | 0.80-0.95 | 0.001   |
| RA:PCWP ratio              | 1.15                   | 1.03-1.28 | 0.01    |
| RVSWI                      | 1.13                   | 1.03-1.23 | 0.01    |
| <b>HF Hospitalization</b>  |                        |           |         |
| PAPi                       | 0.73                   | 0.66-0.80 | <0.001  |
| RA:PCWP ratio              | 1.26                   | 1.12-1.40 | <0.001  |
| RVSWI                      | 0.78                   | 0.68-0.88 | <0.001  |

Abbreviations: HR, hazard ratio; HF, heart failure; PAPi, pulmonary artery pulsatility index; RA:PCWP, right atrium: pulmonary capillary wedge pressure; RV, right ventricle/ventricular; RVSWI, right ventricular stroke work index.

**Table S2. Cross-sectional association with BMI and RV function stratified by prevalent HF**

| Predictors                  | No prevalent HF (n=5629) |                |         | Prevalent HF (n=2656) |                |         |
|-----------------------------|--------------------------|----------------|---------|-----------------------|----------------|---------|
|                             | $\beta$ estimate         | Standard error | p value | $\beta$ estimate      | Standard error | p value |
| <b><i>PAPi</i></b>          |                          |                |         |                       |                |         |
| BMI                         | -0.27                    | 0.01           | <0.001  | -0.24                 | 0.02           | <0.001  |
| <b><i>RA:PCWP ratio</i></b> |                          |                |         |                       |                |         |
| BMI                         | 0.26                     | 0.01           | <0.001  | 0.25                  | 0.02           | <0.001  |
| <b><i>RVSWI</i></b>         |                          |                |         |                       |                |         |
| BMI                         | 0.03                     | 0.02           | 0.03    | -0.003                | 0.02           | 0.89    |

Abbreviations: BMI, body mass index; HF, heart failure; PAPi, pulmonary artery pulsatility index; RA:PCWP, right atrium: pulmonary capillary wedge pressure; RV, right ventricle/ventricular; RVSWI, right ventricular stroke work index.

**Table S3. Cross-sectional association with BMI and RV function stratified by prevalent PH**

| Predictors                  | No Prevalent PH (n=3077) |                |         | Prevalent PH (n=5208) |                |         |
|-----------------------------|--------------------------|----------------|---------|-----------------------|----------------|---------|
|                             | $\beta$ estimate         | Standard error | p value | $\beta$ estimate      | Standard error | p value |
| <b><i>PAPi</i></b>          |                          |                |         |                       |                |         |
| BMI                         | -0.25                    | 0.02           | <0.001  | -0.23                 | 0.01           | <0.001  |
| <b><i>RA:PCWP ratio</i></b> |                          |                |         |                       |                |         |
| BMI                         | 0.28                     | 0.02           | <0.001  | 0.24                  | 0.01           | <0.001  |
| <b><i>RVSWI</i></b>         |                          |                |         |                       |                |         |
| BMI                         | -0.08                    | 0.02           | <0.001  | -0.04                 | 0.01           | 0.004   |

Abbreviations: BMI, body mass index; HF, heart failure; PAPi, pulmonary artery pulsatility index; PH, pulmonary hypertension; RA:PCWP, right atrium: pulmonary capillary wedge pressure; RV, right ventricle/ventricular; RVSWI, right ventricular stroke work index.

**Table S4. Associations of BMI and obesity classes with indices of RV function stratified by EF**

| Predictors                  | HFrEF            |                |         |         | HFpEF            |                |         |         |
|-----------------------------|------------------|----------------|---------|---------|------------------|----------------|---------|---------|
|                             | $\beta$ estimate | Standard error | p value | p-trend | $\beta$ estimate | Standard error | p value | p-trend |
| <b><i>PAPi</i></b>          |                  |                |         |         |                  |                |         |         |
| BMI                         | -0.26            | 0.03           | <0.001  | N/A     | -0.17            | 0.03           | <0.001  | N/A     |
| Obesity Class               |                  |                |         |         |                  |                |         |         |
| Normal                      | REF              |                |         |         | REF              |                |         |         |
| Overweight                  | -0.24            | 0.06           | <0.001  | 0.008   | -0.20            | 0.09           | 0.02    | 0.06    |
| Class 1                     | -0.51            | 0.08           | <0.001  |         | -0.48            | 0.09           | <0.001  |         |
| Class 2+3                   | -0.69            | 0.08           | <0.001  |         | -0.56            | 0.10           | <0.001  |         |
| <b><i>RA:PCWP ratio</i></b> |                  |                |         |         |                  |                |         |         |
| BMI                         | 0.27             | 0.03           | <0.001  | N/A     | 0.18             | 0.03           | <0.001  | N/A     |
| Obesity Class               |                  |                |         |         |                  |                |         |         |
| Normal                      | REF              |                |         |         | REF              |                |         |         |
| Overweight                  | 0.32             | 0.07           | <0.001  | <0.001  | 0.25             | 0.09           | 0.006   |         |
| Class 1                     | 0.57             | 0.08           | <0.001  |         | 0.48             | 0.10           | <0.001  | 0.02    |
| Class 2+3                   | 0.68             | 0.09           | <0.001  |         | 0.57             | 0.11           | <0.001  |         |
| <b><i>RVSWI</i></b>         |                  |                |         |         |                  |                |         |         |
| BMI                         | -0.04            | 0.03           | 0.24    | N/A     | -0.06            | 0.04           | 0.09    | N/A     |
| Obesity Class               |                  |                |         |         |                  |                |         |         |
| Normal                      | REF              |                |         | 0.72    | REF              |                |         | 0.66    |
| Overweight                  | -0.02            | 0.07           | 0.77    |         | 0.03             | 0.10           | 0.78    |         |
| Class 1                     | -0.10            | 0.08           | 0.23    |         | -0.17            | 0.10           | 0.11    |         |
| Class 2+3                   | -0.12            | 0.09           | 0.20    |         | -0.22            | 0.11           | 0.05    |         |

Abbreviations: BMI, body mass index; EF, ejection fraction; HFpEF, heart failure with preserved ejection fraction; HFrEF, heart failure with reduced ejection fraction; PAPi, pulmonary artery pulsatility index; RA:PCWP, right atrium: pulmonary capillary wedge pressure; RV, right ventricle/ventricular; RVSWI, right ventricular stroke work index.

**Table S5. Associations between adverse outcomes and RV function stratified by EF**

| Predictors                 | HFrEF           |      |           |         | HFpEF           |      |           |         |
|----------------------------|-----------------|------|-----------|---------|-----------------|------|-----------|---------|
|                            | Event/<br>total | HR   | 95% CI    | p value | Event/<br>total | HR   | 95% CI    | p value |
| <b>All-Cause Mortality</b> |                 |      |           |         |                 |      |           |         |
| PAPi                       | 685/1242        | 0.83 | 0.73-0.95 | 0.007   | 431/820         | 0.93 | 0.78-1.12 | 0.45    |
| RA:PCWP ratio              | 685/1242        | 1.20 | 1.05-1.37 | 0.008   | 431/820         | 1.01 | 0.85-1.20 | 0.92    |
| RVSWI                      | 622/1134        | 1.12 | 1.01-1.23 | 0.03    | 374/729         | 0.99 | 0.99-1.12 | 0.88    |
| <b>HF Hospitalization</b>  |                 |      |           |         |                 |      |           |         |
| PAPi                       | 643/1230        | 0.83 | 0.74-0.92 | <0.001  | 272/816         | 0.93 | 0.78-1.12 | 0.46    |
| RA:PCWP ratio              | 643/1230        | 1.15 | 1.03-1.28 | 0.01    | 272/816         | 1.13 | 1.01-1.27 | 0.04    |
| RVSWI                      | 580/1122        | 0.87 | 0.78-0.97 | 0.01    | 244/727         | 1.10 | 0.92-1.32 | 0.03    |

Abbreviations: EF, ejection fraction; HR, hazard ratio; HF, heart failure; HFpEF, heart failure with preserved ejection fraction; HFrEF, heart failure with reduced ejection fraction; PAPi, pulmonary artery pulsatility index; RA:PCWP, right atrium: pulmonary capillary wedge pressure; RV, right ventricle/ventricular; RVSWI, right ventricular stroke work index

**Table S6. Associations of BMI and obesity classes with indices of RV function stratified by PH subtype**

| Predictors           | Precapillary PH  |                |         | Postcapillary PH |                |         | Mixed PH         |                |         |
|----------------------|------------------|----------------|---------|------------------|----------------|---------|------------------|----------------|---------|
|                      | $\beta$ estimate | Standard error | p value | $\beta$ estimate | Standard error | p value | $\beta$ estimate | Standard error | p value |
| <b>PAPi</b>          |                  |                |         |                  |                |         |                  |                |         |
| BMI                  | -0.20            | 0.04           | <0.001  | -0.17            | 0.02           | <0.001  | -0.14            | 0.03           | <0.001  |
| Obesity Class        |                  |                |         |                  |                |         |                  |                |         |
| Normal               | REF              |                |         | REF              |                |         |                  |                |         |
| Overweight           | -0.20            | 0.10           | 0.04    | -0.16            | 0.05           | <0.001  | -0.25            | 0.07           | <0.001  |
| Class 1              | -0.32            | 0.12           | 0.006   | -0.41            | 0.05           | <0.001  | -0.37            | 0.08           | <0.001  |
| Class 2+3            | -0.56            | 0.14           | <0.001  | -0.52            | 0.05           | <0.001  | -0.39            | 0.09           | <0.001  |
| <b>RA:PCWP ratio</b> |                  |                |         |                  |                |         |                  |                |         |
| BMI                  | 0.24             | 0.05           | <0.001  | 0.18             | 0.02           | <0.001  | 0.17             | 0.03           | <0.001  |
| Obesity Class        |                  |                |         |                  |                |         |                  |                |         |
| Normal               | REF              |                |         | REF              |                |         | REF              |                |         |
| Overweight           | 0.20             | 0.10           | 0.06    | 0.19             | 0.05           | <0.001  | 0.26             | 0.07           | <0.001  |
| Class 1              | 0.40             | 0.13           | 0.002   | 0.42             | 0.05           | <0.001  | 0.38             | 0.08           | <0.001  |
| Class 2+3            | 0.65             | 0.15           | <0.001  | 0.55             | 0.05           | <0.001  | 0.46             | 0.08           | <0.001  |
| <b>RVSWI</b>         |                  |                |         |                  |                |         |                  |                |         |
| BMI                  | -0.04            | 0.04           | 0.27    | 0.00             | 0.02           | 0.91    | 0.08             | 0.04           | 0.02    |
| Obesity Class        |                  |                |         |                  |                |         |                  |                |         |
| Normal               | REF              |                |         | REF              |                |         |                  |                |         |
| Overweight           | -0.14            | 0.09           | 0.13    | 0.10             | 0.06           | 0.08    | 0.00             | 0.09           | 0.97    |
| Class 1              | 0.00             | 0.11           | 0.98    | 0.02             | 0.06           | 0.72    | 0.10             | 0.10           | 0.30    |
| Class 2+3            | -0.17            | 0.13           | 0.22    | 0.02             | 0.06           | 0.76    | 0.18             | 0.11           | 0.09    |

Abbreviations: BMI, body mass index; PAPi, pulmonary artery pulsatility index; PH, pulmonary hypertension; RA:PCWP, right atrium: pulmonary capillary wedge pressure; RV, right ventricle/ventricular; RVSWI, right ventricular stroke work index.



**Table S7. Associations between adverse outcomes and RV function stratified by PH subtype**

| Predictors                 | Event/<br>total | Precapillary PH |           |             | Postcapillary PH |      |           |             | Mixed PH        |      |           | p-<br>value |
|----------------------------|-----------------|-----------------|-----------|-------------|------------------|------|-----------|-------------|-----------------|------|-----------|-------------|
|                            |                 | HR              | 95% CI    | p-<br>value | Event/<br>total  | HR   | 95% CI    | p-<br>value | Event/<br>total | HR   | 95% CI    |             |
| <b>All-Cause Mortality</b> |                 |                 |           |             |                  |      |           |             |                 |      |           |             |
| PAPi                       | 355/688         | 1.02            | 0.88-1.18 | 0.79        | 1070/2488        | 0.73 | 0.64-0.83 | <0.001      | 489/878         | 0.71 | 0.60-0.84 | <0.001      |
| RA:PCWP ratio              | 355/688         | 1.01            | 0.89-1.16 | 0.84        | 1070/2488        | 1.40 | 1.22-1.60 | <0.001      | 489/878         | 1.49 | 1.25-1.78 | <0.001      |
| RVSWI                      | 333/645         | 1.31            | 1.15-1.49 | <0.001      | 954/2236         | 1.01 | 0.94-1.08 | 0.87        | 450/807         | 0.93 | 0.84-1.03 | 0.15        |
| <b>HF hospitalization</b>  |                 |                 |           |             |                  |      |           |             |                 |      |           |             |
| PAPi                       | 154/669         | 0.74            | 0.60-0.91 | 0.005       | 872/2436         | 0.83 | 0.75-0.93 | 0.001       | 391/865         | 0.71 | 0.61-0.83 | <0.001      |
| RA:PCWP ratio              | 154/669         | 1.34            | 1.09-1.64 | 0.005       | 872/2436         | 1.14 | 1.01-1.28 | 0.03        | 391/865         | 1.33 | 1.13-1.57 | <0.001      |
| RVSWI                      | 140/627         | 0.92            | 0.73-1.17 | 0.50        | 778/2193         | 0.87 | 0.79-0.96 | 0.004       | 356/795         | 0.71 | 0.63-0.81 | <0.001      |

Abbreviations: HR, hazard ratio; HF, heart failure; PAPi, pulmonary artery pulsatility index; PH, pulmonary hypertension; RA:PCWP, right atrium: pulmonary capillary wedge pressure; RV, right ventricle/ventricular; RVSWI, right ventricular stroke work index.
